# Supplementary material for: Filling the gaps in SARDs research: collection and linkage of administrative health data and self-reported survey data for a general population-based cohort of individuals with and without diagnoses of systemic autoimmune rheumatic disease (SARDs) from British Columbia, Canada
Source: PubMed Central journal article supplement — BMJ Open. 2017 Jun 21;7(6):e013977. doi: 10.1136/bmjopen-2016-013977 (PMC5541381; doi:10.1136/bmjopen-2016-013977), 2017-06-21
Supplement: bmjopen-2016-013977supp001.pdf [file bmjopen-2016-013977supp001.pdf]

**International Classification of Diseases 9<sup>th</sup> (ICD-9) and 10<sup>th</sup> (ICD-10) Revision Diagnostic Codes for Systemic Autoimmune Rheumatic Diseases (SARDs)**

| <b>Diagnosis</b>                      | <b>ICD-9</b> | <b>ICD-10</b>                                                             |
|---------------------------------------|--------------|---------------------------------------------------------------------------|
| All connective tissue diseases        | 710 710.X    | M32.1 M32.8 M32.9<br>M34.X<br>M35.0 M35.1<br>M33.0, M33.1, M33.9<br>M33.2 |
| Systemic lupus erythematosus (SLE)    | 710.0        | M32.1 M32.8 M32.9                                                         |
| Scleroderma/systemic sclerosis (SSc)  | 710.1        | M34.X                                                                     |
| Sjogren's syndrome (SjD)              | 710.2        | M35.0                                                                     |
| Dermatomyositis (DM)                  | 710.3        | M33.0, M33.1, M33.9                                                       |
| Polymyositis (PM)                     | 710.4        | M33.2                                                                     |
| Polyarteritis nodosa (PAN)            | 446.0        | M30.0                                                                     |
| Granulomatous with polyangiitis (GPA) | 446.4        | M31.3                                                                     |
| Giant cell arteritis (GCA)            | 446.5        | M31.5                                                                     |
| Takayasu disease                      | 446.7        | M31.4                                                                     |
